# Supplementary material for: Tensile strains give rise to strong size effects for thermal conductivities of silicene, germanene and stanene
Source: Royal Society of Chemistry journal article supplement (doi:10.1039/c5nr08231e), 2016-01-01
Supplement: c5nr08231e1.pdf [file c5nr08231e1.pdf]

**Supplementary Information for**  
**Tensile strains give rise to strong size effects for thermal conductivities**  
**of silicene, germanene and stanene**

Y. Kuang,<sup>\*a</sup> L. Lindsay,<sup>b</sup> S. Q. Shi<sup>c,d</sup> and G. P. Zheng<sup>c</sup>

<sup>a</sup>College of Science and Engineering, Jinan University, Guangzhou, China

<sup>b</sup>Materials Science and Technology Division, Oak Ridge National Laboratory, Oak Ridge, Tennessee 37831, USA

<sup>c</sup>Department of Mechanical Engineering, the Hong Kong Polytechnic University, Hung Hom, Kowloon, Hong Kong

<sup>d</sup>Hong Kong Polytechnic University Shenzhen Research Institute, Shenzhen, China

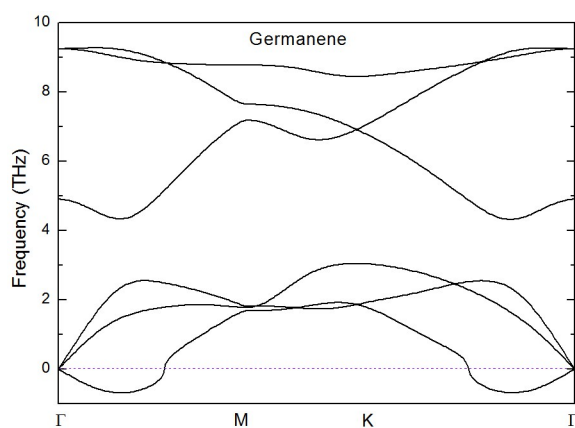

Figure S1. Calculated phonon dispersion of unstrained germanene (*d*-electron included in valence). The ground state was determined by full geometrical optimization based on

---

\*Corresponding author. Tel.: Fax: [+852-28315139](tel:+852-28315139). E-mail address: [kuangzhang88@gmail.com](mailto:kuangzhang88@gmail.com)(Y. Kuang)

the following setup: plane wave cutoff 560 eV,  $28 \times 28$  k-mesh, energy convergence tolerance of  $1.0 \times 10^{-9}$ , force convergence precision  $1.0 \times 10^{-6}$  eV/Å and a vacuum layer thickness 1.6 nm using the VASP package. We obtain an equilibrium lattice constant of 3.954 Å and a buckling height of 0.638 Å. The harmonic IFCs are calculated using a  $7 \times 7$  supercell without additional neighbor cutoff, a  $4 \times 4$  k-mesh and the same plane wave cutoff, energy convergence tolerance and vacuum layer thickness as those used for the optimization. Note the soft (imaginary) out-of-plane acoustic modes at low frequency.

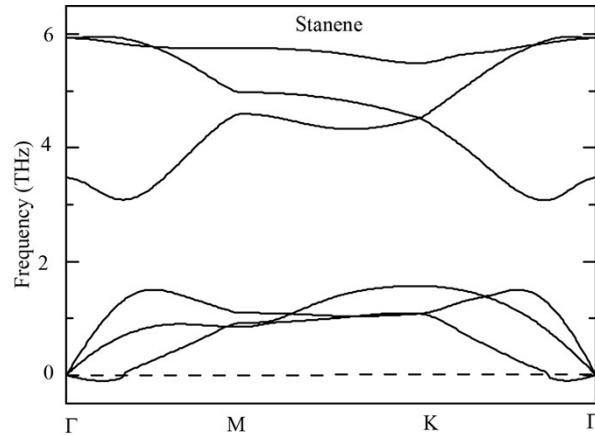

Figure S2. Phonon dispersion of unstrained stanene based on the setups of fast Fourier transformations (FFT) grid densities  $NGX=360$  and  $NGY=360$  respectively for two vertical in-plane directions and  $NGZ=90$  for the out-of-plane direction. In the manuscript the phonon dispersion of unstrained stanene (Figure 1c), the corresponding FFT grid densities are  $NGX=180$ ,  $NGY=180$  and  $NGZ=90$ . No significant difference in the ZA phonon dispersion is seen with increasing FFT grid density.

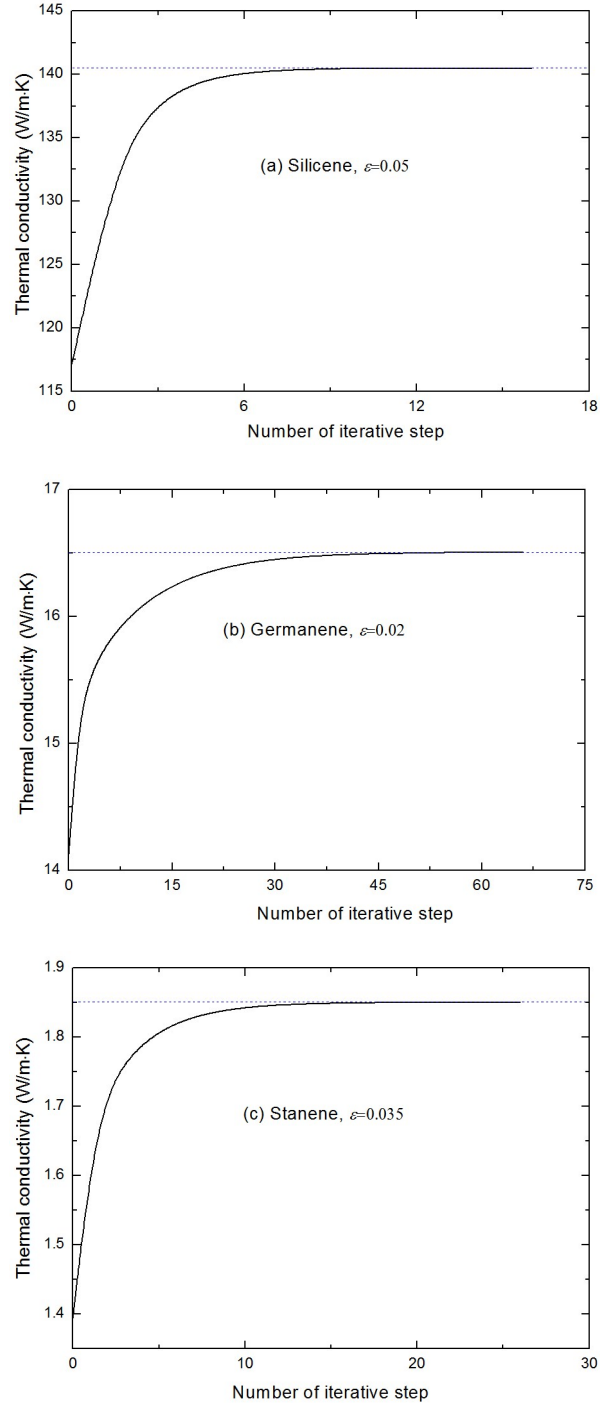

Figure S3. The thermal conductivity as a function of iterative step for silicene at  $\varepsilon=0.05$ , germanene at  $\varepsilon=0.02$  and stanene at  $\varepsilon=0.035$  corresponding to  $q$ -point grid density  $N_1=301$ . Good convergence is achieved after 16, 64 and 27 iterations using convergence precision  $1 \times 10^{-5}$  for silicene, germanene and stanene, respectively.
